# Supplementary material for: The protective effects of electroacupuncture on intestinal barrier lesions in IBS and UC model
Source: PubMed Central journal article supplement (PMC10160055; doi:10.1038/s41598-023-34182-z), 2023-05-04

# Western Blot of PV-1 and GAPDH

No.1

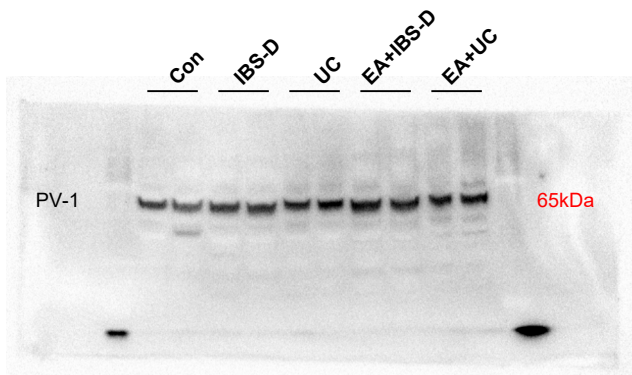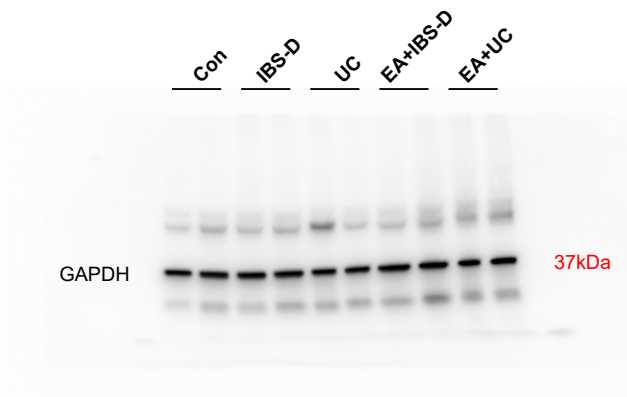

No.2

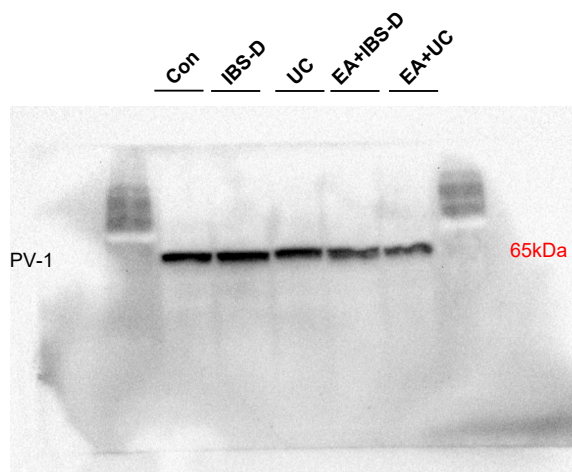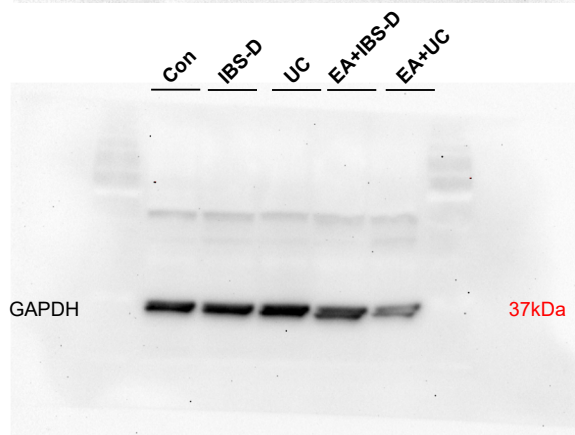

No.3

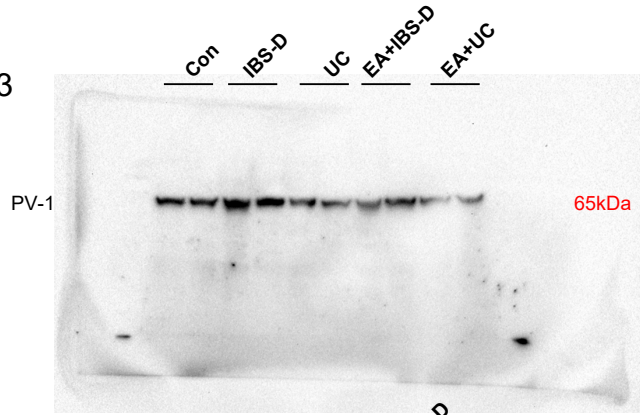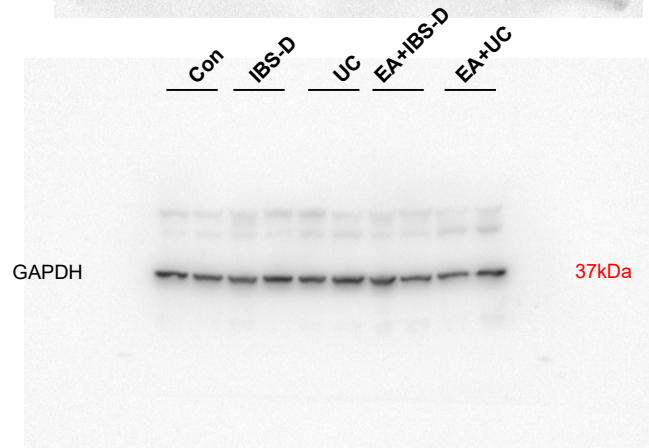

No.4

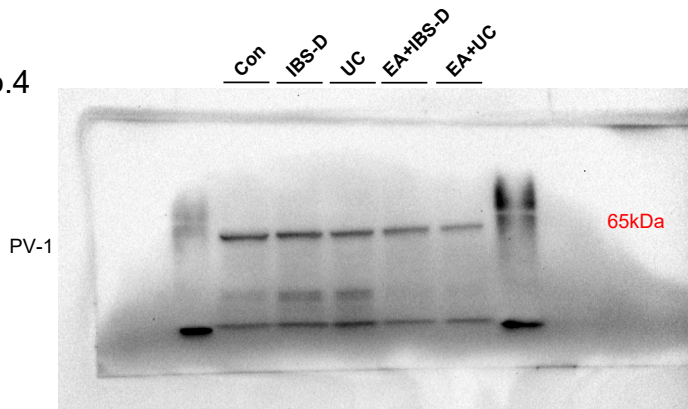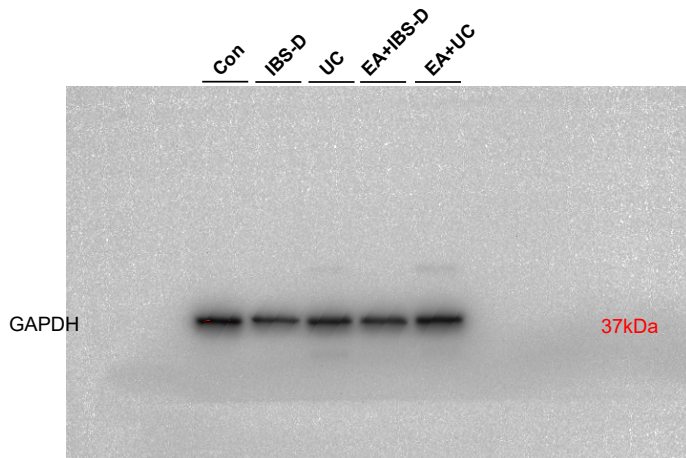

No.5

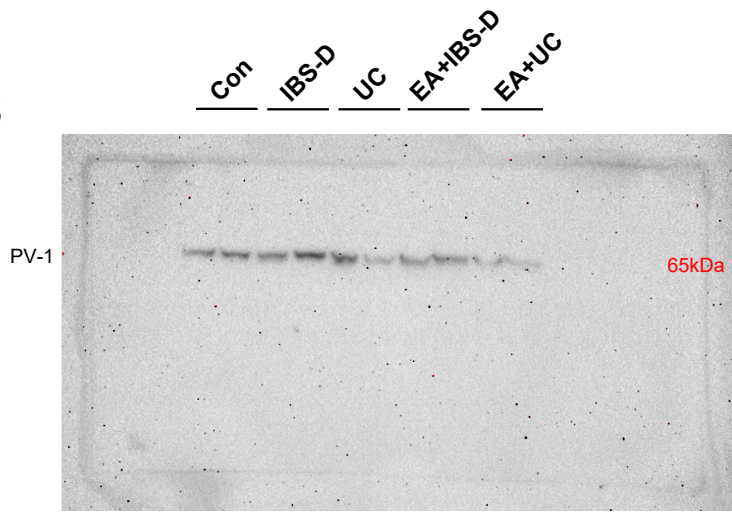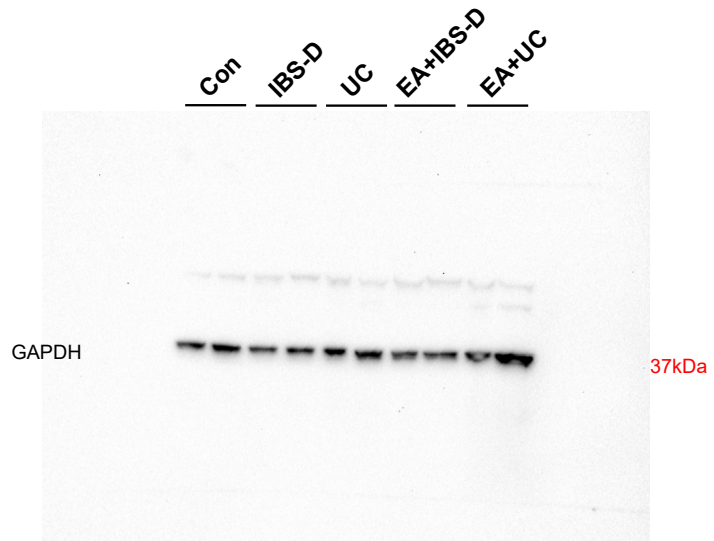

Supplement: 41598_2023_34182_MOESM1_ESM.pdf [file 41598_2023_34182_MOESM1_ESM.pdf]
